# Supplementary material for: Longitudinal Pathogenic Properties and N-Glycosylation Profile of Antibodies from Patients with Pemphigus after Corticosteroid Treatment
Source: MDPI journal article supplement (doi:10.3390/biomedicines9101411), 2021-10-08
Supplement: s1 [file s1]

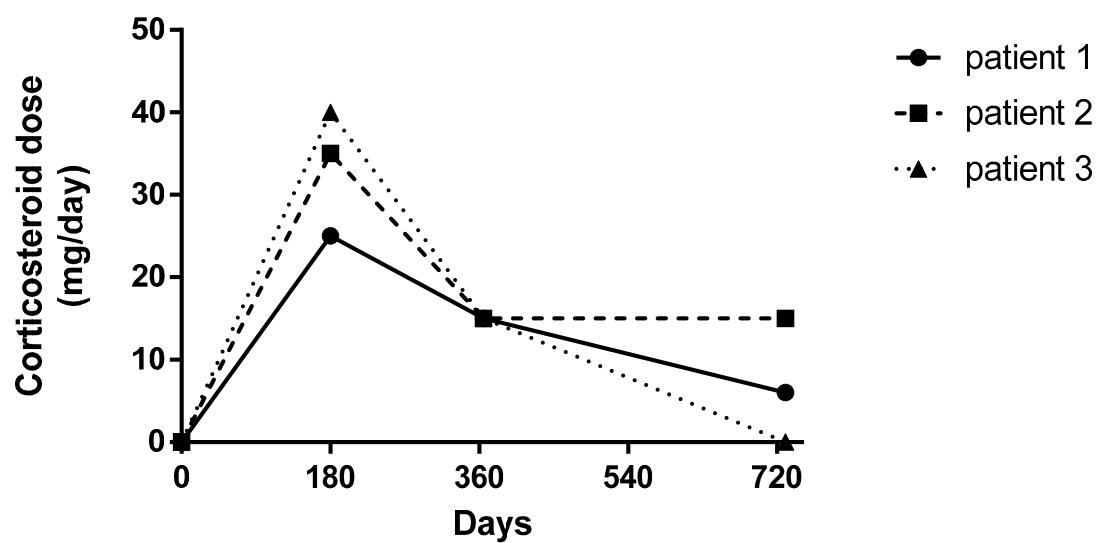

**Supplemental Figure S1.** Evolution of prednisone doses (mg/day), from D0 to D730. Plain line with circle = patient 1; dashed line with square = patient 2; dotted line with triangle = patient 3.

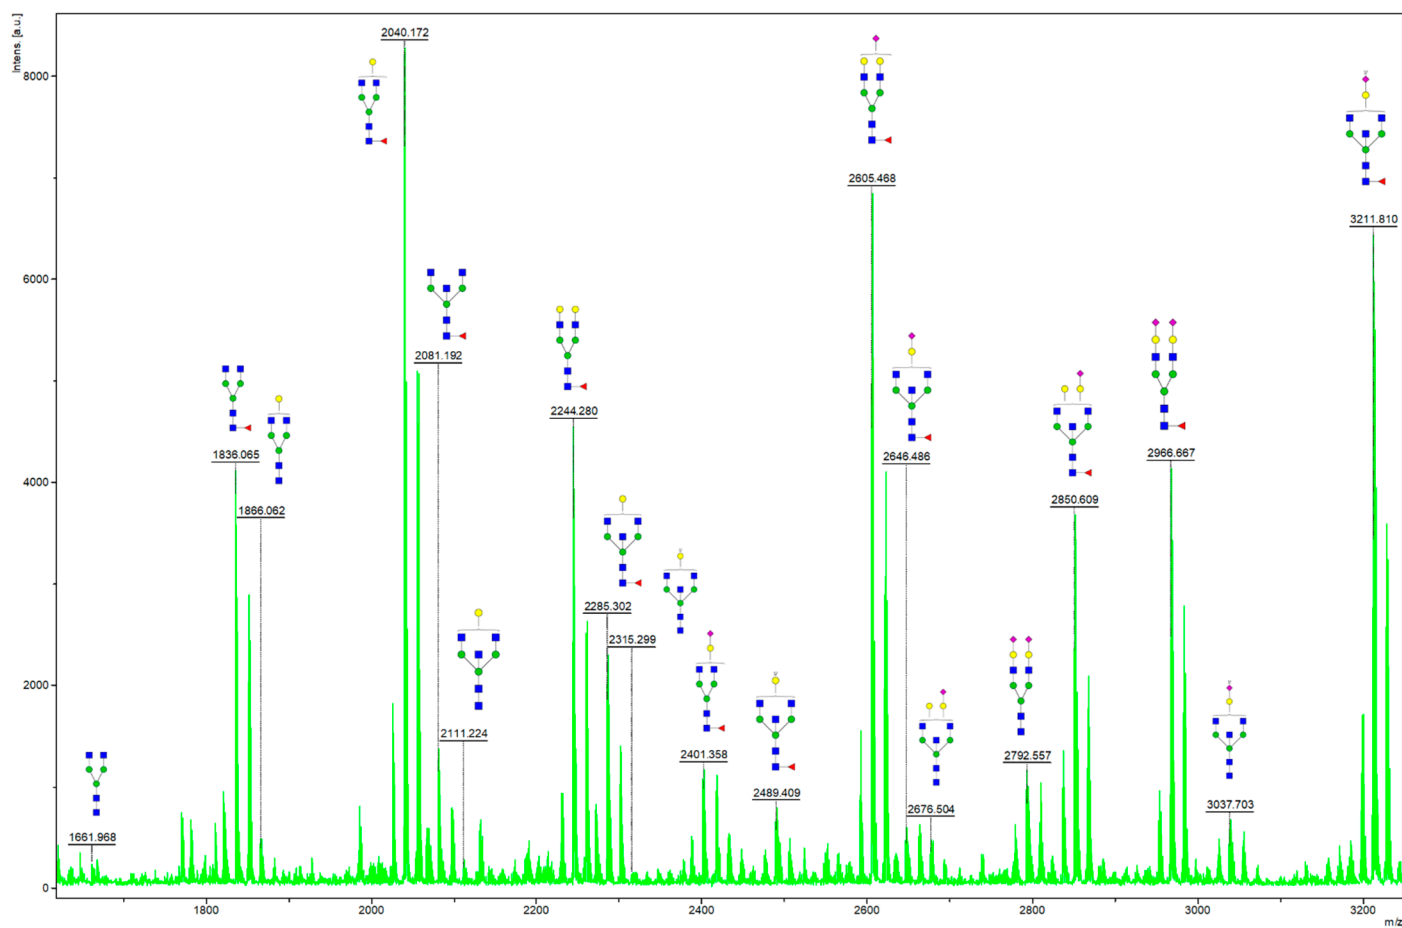

**Supplemental Figure S2.** Example of a mass spectrum of IgG Fc *N*-glycan from healthy donor. Blue square, *N*-acetylglucosamine; red triangle, fucose; green circle, mannose; yellow circle, galactose; purple diamond, *N*-acetylneuraminic acid. Glycans are drawn according to the international nomenclature recently updated [32].

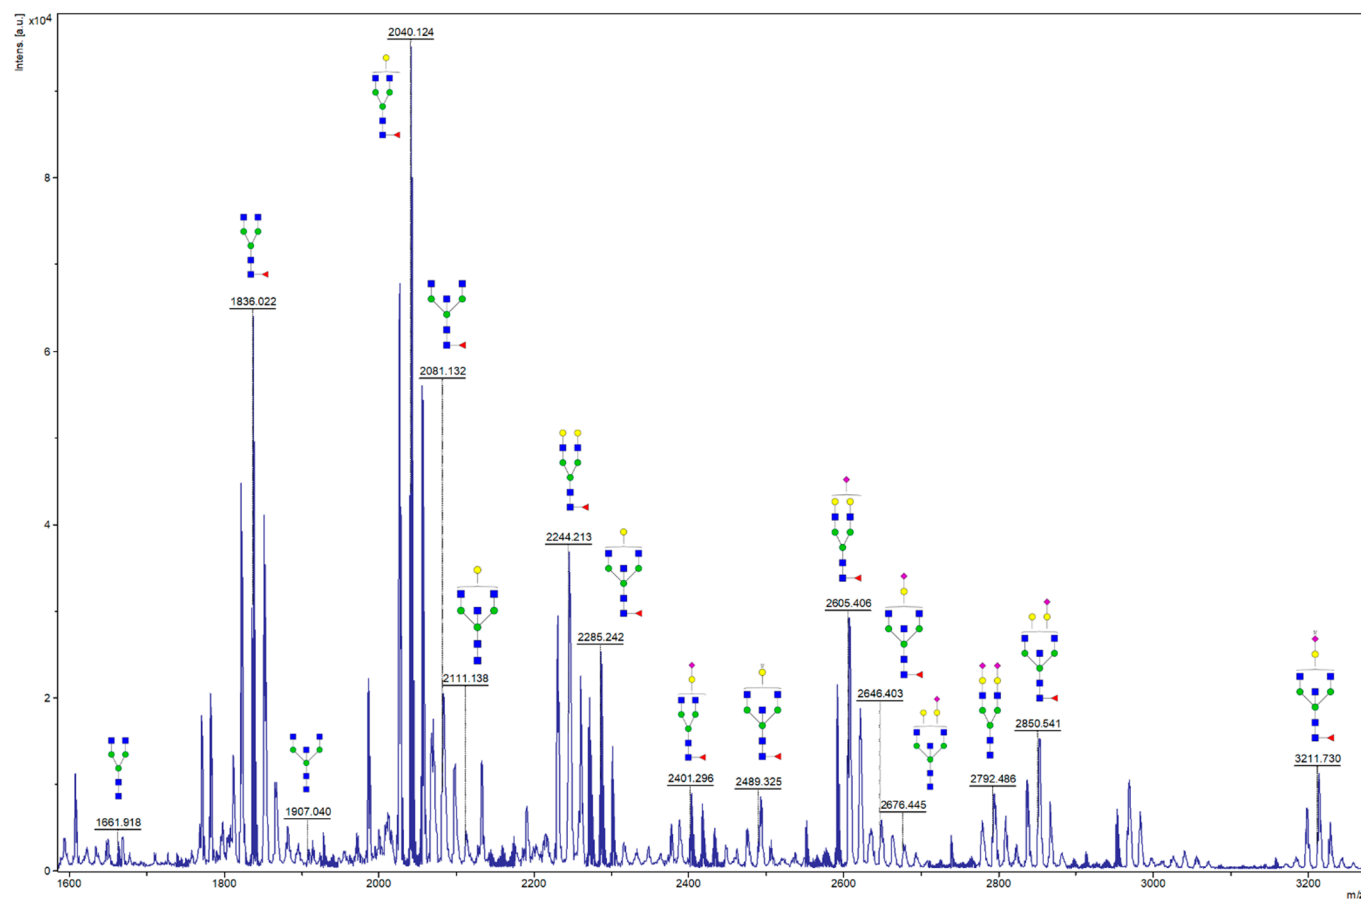

**Supplemental Figure S3.** Example of mass spectrum obtained for IgG Fc *N*-glycans from a pemphigus patient at D0. Blue square, *N*-acetylglucosamine; red triangle, fucose; green circle, mannose; yellow circle, galactose; purple diamond, *N*-acetylneuraminic acid that belongs to the sialic acids. Glycans are drawn according to the international nomenclature recently updated [32].
